# Supplementary material for: Hollow-Structured Microporous Organic Networks Adsorbents Enabled Specific and Sensitive Identification and Determination of Aflatoxins
Source: MDPI journal article supplement (doi:10.3390/toxins14020137), 2022-02-13
Supplement: s1 [file s1]

# Supplementary Materials: Hollow-Structured Microporous Organic Networks Adsorbents Enabled Specific and Sensitive Identification and Determination of Aflatoxins

Lu Yang, Jin Wang, Huan Lv, Xue-Meng Ji, Jing-Min Liu and Shuo Wang

## S1. Experimental section

### *Synthesis of Fe<sub>3</sub>O<sub>4</sub> microparticles*

The Magnetic Fe<sub>3</sub>O<sub>4</sub> microparticles were prepared via a solvothermal reaction [1]. First, a mixture of FeCl<sub>3</sub>·6H<sub>2</sub>O (27 g), anhydrous sodium acetate (57.5 g) were dissolved into glycol (500 mL) and stirred intensely for 60 min. Then, transferred the system into Teflon-lined autoclaves and reacted at 200°C for 8 h. After cooled to room temperature, black magnetic production was collected and washed with ethanol and ultrapure water for five times. Finally, dried it at 60°C for 12 h.

The silica-coated magnetic Fe<sub>3</sub>O<sub>4</sub> microspheres were synthesized as reported previously [2]. Briefly, Fe<sub>3</sub>O<sub>4</sub> microspheres obtained previously (1.0 g) were added into 200 mL of HCl (0.1 M) with ultrasonication, then washed with ultrapure water for several times. The Fe<sub>3</sub>O<sub>4</sub> microspheres were dispersed in a mixture of ultrapure water (80 mL), ethanol (320 mL), and NH<sub>3</sub>·H<sub>2</sub>O solution (5.0 mL, 25–28%). Subsequently, TEOS (1 mL) was introduced to the reaction after ultrasonication for 15 min. The solution was conducted for 12 h with mechanical stirring. The resultants were collected with a magnet, washed with ultrapure water and ethanol for five times and dried under vacuum.

### *Synthesis of Fe<sub>3</sub>O<sub>4</sub>@SiO<sub>2</sub>@UiO-66-NH<sub>2</sub>*

The Fe<sub>3</sub>O<sub>4</sub>@SiO<sub>2</sub>@UiO-66-NH<sub>2</sub> were obtained through a solvothermal method. Firstly, Fe<sub>3</sub>O<sub>4</sub>@SiO<sub>2</sub> (150 mg), Zirconium (IV) chloride (300 mg, 1287 μmol) and water (75 μL) were added to 20 mL N, N-dimethylformamide (DMF) and stirred for 15 min. Then, 2-Aminoterephthalic acid (235 mg, 1298 μmol) was added to 10 mL DMF and stirred until entirely soluble. The above system was transferred into Teflon-lined autoclaves and heated at 120 °C for 24 h. Brownish magnetic materials were obtained after cooled to room temperature, and washed with ultrapure water for five times. Finally, dried under vacuum. In addition, UiO-66-NH<sub>2</sub> was prepared parallelly without the addition of Fe<sub>3</sub>O<sub>4</sub>@SiO<sub>2</sub> for comparison.

### *Synthesis of Fe<sub>3</sub>O<sub>4</sub>@UiO-66-NH<sub>2</sub>@MON*

For the synthesis of Fe<sub>3</sub>O<sub>4</sub>@UiO-66-NH<sub>2</sub>@MON, Fe<sub>3</sub>O<sub>4</sub>@UiO-66-NH<sub>2</sub> (200 mg), (PPh<sub>3</sub>)<sub>2</sub>PdCl<sub>2</sub> (3.4 mg, 4.8 μmol), CuI (1.0 mg, 5.2 μmol) were dispersed with toluene (15 mL) and triethylamine (15 mL) in a 100 mL three-necked flask. After the mixture was sonicated for 0.5 h and mechanically stirred at 90 °C for 30 min, tetrakis(4-ethynylphenyl)methane (50 mg, 0.12 mmol) and 1,4-diiodobenzene (80 mg, 0.24 mmol) were added. Then, the system was reacted at 90 °C for 6 h. After cooled to room temperature, the resultant was separated using a magnet, washed five times with dichloromethane and methanol, dried under vacuum. For the synthesized of the hollow MON, the obtained Fe<sub>3</sub>O<sub>4</sub>@UiO-66-NH<sub>2</sub>@MON was dissolved into HF solution (48~51%), methanol, and water. Caution: the HF solution is highly dangerous and should be extreme care when used (specific gloves and hood). After stirring for 2 h, centrifuged, washed and dried.

## S2. Adsorption kinetics

The adsorption capacity of the as prepared materials was investigated by adsorption kinetics and bonding experiment. Typically, a precisely weighed 10 mg Fe<sub>3</sub>O<sub>4</sub>@MOF@MON was dispersed in 5 mL

AFT standard solutions with the working concentrations, followed by gently shaking for several time to ensure the sufficiently contact of targets with the adsorption materials. Then, the  $\text{Fe}_3\text{O}_4\text{@MOF@MON}$  was collected with an external magnet and the supernatant were determined by HPLC analysis. Several important parameters such as the adsorption capacity of matrices (q) and removal percentage of phytochromes (R%) were calculated by the following equations:

$$q = \frac{(C_0 - C_e) \times 5}{10}$$

$$R(\%) = \frac{C_0 - C_e}{C_0} \times 100\%$$

where  $C_0$  ( $\text{mg L}^{-1}$ ) and  $C_e$  ( $\text{mg L}^{-1}$ ) are AFT concentrations before and after HMON treatment respectively; 5 represents the liquid phase volume (mL) and 10 indicates the mass of HMON (mg).

## References

1. S.-W. Lv, J.-M. Liu, C.-Y. Li, H. Ma, Z.-H. Wang, N. Zhao, S. Wang, Fabrication of  $\text{Fe}_3\text{O}_4\text{@UiO-66-SO}_3\text{H}$  core-shell functional adsorbents for highly selective and efficient removal of organic dyes, *New J. Chem.*, **43**, **2019**, 7770–7777.
2. S.-H. Huo, X.-P. Yan, Facile magnetization of metal-organic framework MIL-101 for magnetic solid-phase extraction of polycyclic aromatic hydrocarbons in environmental water samples, *Analyst*, **137**, **2012**, 3445–3451.
